# Supplementary material for: Emergent zero-field anomalous Hall effect in a reconstructed rutile antiferromagnetic metal
Source: PubMed Central journal article supplement (PMC10716394; doi:10.1038/s41467-023-43962-0), 2023-12-12
Supplement: 41467_2023_43962_MOESM1_ESM.pdf [file 41467_2023_43962_MOESM1_ESM.pdf]

**Supplementary Information for**  
**Emergent zero-field anomalous Hall effect in a reconstructed rutile**  
**antiferromagnetic metal**

Meng Wang<sup>1,\*†</sup>, Katsuhiko Tanaka<sup>2,†</sup>, Shiro Sakai<sup>1</sup>, Ziqian Wang<sup>1</sup>, Ke Deng<sup>3,4</sup>, Yingjie Lyu<sup>5</sup>, Cong Li<sup>5</sup>, Di Tian<sup>5</sup>, Shengchun Shen<sup>6</sup>, Naoki Ogawa<sup>1,7</sup>, Naoya Kanazawa<sup>8</sup>, Pu Yu<sup>5</sup>, Ryotaro Arita<sup>1,2</sup>, Fumitaka Kagawa<sup>1,9,\*</sup>

<sup>1</sup>*RIKEN Center for Emergent Matter Science (CEMS), Wako, 351-0198, Japan.*

<sup>2</sup>*Research Center for Advanced Science and Technology, University of Tokyo, Tokyo 153-8904, Japan.*

<sup>3</sup>*Shenzhen Institute for Quantum Science and Engineering, Southern University of Science and Technology (SUSTech), Shenzhen 518055, China.*

<sup>4</sup>*International Quantum Academy, Shenzhen 518048, China.*

<sup>5</sup>*State Key Laboratory of Low Dimensional Quantum Physics and Department of Physics, Tsinghua University, Beijing, 100084, China.*

<sup>6</sup>*Department of Physics, University of Science and Technology of China, Hefei, 230026, China.*

<sup>7</sup>*Department of Applied Physics and Quantum-Phase Electronics Center (QPEC), University of Tokyo, Tokyo 113-8656, Japan.*

<sup>8</sup>*Institute of Industrial Science, The University of Tokyo, Tokyo 153-8505, Japan.*

<sup>9</sup>*Department of Physics, Tokyo Institute of Technology, Tokyo 152-8551, Japan.*

\*Corresponding authors. Email: meng.wang@riken.jp; fumitaka.kagawa@riken.jp

†These authors contributed equally: Meng Wang, Katsuhiko Tanaka.

**Supplementary Note 1, Symmetry analysis of AHE for rutile RuO<sub>2</sub>.**

**Supplementary Note 2, Curie-Weiss law fitting and calculation of effective moment.**

**Supplementary Note 3, Distinguish the side-jump and intrinsic anomalous Hall conductivity.**

**Supplementary Table 1, Spin order and moments of Ru<sub>0.75</sub>Cr<sub>0.25</sub>O<sub>2</sub> calculated with DFT with the b-axis doubled cell.**

**Supplementary Table 2, Spin order and moments calculated with DFT for Ru<sub>0.5</sub>Cr<sub>0.5</sub>O<sub>2</sub>.**

**Supplementary Fig. 1, AHE in RuO<sub>2</sub> films grown on TiO<sub>2</sub>.**

**Supplementary Fig. 2, DFT+*U* calculations on the anisotropy of pure RuO<sub>2</sub>.**

**Supplementary Fig. 3, Calculated results for Ru<sub>1-x</sub>Cr<sub>x</sub>O<sub>2</sub>.**

**Supplementary Fig. 4, Structure characteristics and surface morphology of the Ru<sub>1-x</sub>Cr<sub>x</sub>O<sub>2</sub> films.**

**Supplementary Fig. 5, Transport properties in  $\text{Ru}_{1-x}\text{Cr}_x\text{O}_2$  (110) and the  $x = 0.2$  film with current along different directions.**

**Supplementary Fig. 6, Magnetization measurements in a  $\text{Ru}_{0.8}\text{Cr}_{0.2}\text{O}_2$  (110) film.**

**Supplementary Fig. 7, Magnetic-field dependent Hall conductivity at various temperatures.**

**Supplementary Fig. 8, Scaling of  $\sigma_{xy}^M \sim \sigma_{xx}$  in the  $\text{Ru}_{0.8}\text{Cr}_{0.2}\text{O}_2$  (110) films.**

**Supplementary Fig. 9, Magnetoresistivity (MR) measured for the  $\text{Ru}_{0.8}\text{Cr}_{0.2}\text{O}_2$  (110) film.**

**Supplementary Note 1, Symmetry analysis of AHE for rutile  $\text{RuO}_2$ :**

The Hall vector  $\boldsymbol{\sigma}_{\text{Hall}} = (\sigma_{yz}, \sigma_{zx}, \sigma_{xy})$ , is defined as in reference 14. The  $\text{RuO}_2$  with the Néel vector along the [001] direction has a magnetic space group (MSG) of  $P4_2'/mnm'$ . The  $P4_2'/mnm'$  has  $t_{1/2}C_{2x}$  and  $t_{1/2}C_{2y}$  symmetry operations, where  $C_{2x}$  ( $C_{2y}$ ) is an operation of rotating  $180^\circ$  along the x (y) axis and  $t_{1/2}$  denotes a translation ( $a/2$ ,  $b/2$ ,  $c/2$ ), which correspond to  $C_{2x}$  and  $C_{2y}$  in the magnetic point group (MPG). Furthermore,  $C_{2x}(\sigma_{yz}, \sigma_{zx}, \sigma_{xy}) = (\sigma_{yz}, -\sigma_{zx}, -\sigma_{xy})$  and  $C_{2y}(\sigma_{yz}, \sigma_{zx}, \sigma_{xy}) = (-\sigma_{yz}, \sigma_{zx}, -\sigma_{xy})$ , demonstrate  $\boldsymbol{\sigma}_{\text{Hall}} = \mathbf{0}$ ; i.e.,  $\sigma_{yz}$ ,  $\sigma_{zx}$ , and  $\sigma_{xy}$  are all prohibited. In contrast, when the Néel vector is along [100] and [110], the MSG is  $Pnn'm'$  and  $Cmm'm'$ , respectively. The MPG symmetry operations in  $Pnn'm'$  include  $TC_{2x}$ ,  $C_{2y}$  and  $TC_{2z}$ , where  $T$  represents the time-reversal operation; i.e.,  $TC_{2x}(\sigma_{yz}, \sigma_{zx}, \sigma_{xy}) = (-\sigma_{yz}, \sigma_{zx}, \sigma_{xy})$  and  $TC_{2z}(\sigma_{yz}, \sigma_{zx}, \sigma_{xy}) = (\sigma_{yz}, \sigma_{zx}, -\sigma_{xy})$ . Thus, only  $\sigma_{zx}$  can be allowed. Given the fact that  $Pnn'm'$  and  $Cmm'm'$  consider different principal axes, one can conclude that the Hall vector is finite and directed along [010] (when the Néel vector  $\parallel$  [100]) and [110] (when the Néel vector  $\parallel$  [110]).

**Supplementary Note 2, Curie-Weiss law fitting and calculation of effective moment:**

According to the Curie-Weiss law, the magnetic order can be checked utilizing the relationship of magnetic susceptibility ( $\chi$ ) and absolute temperature ( $T$ ) at the temperature regions above the magnetic ordering transitions, by:<sup>29,30</sup>

$$\chi = C / (T - \theta_w) \quad (1)$$

where  $C$  is the Curie constant and  $\theta_w$  is often referred to as the Weiss temperature (or Weiss constant). The fittings of Equation (1) with a positive, negative, and zero of  $\theta_w$  indicate the ferromagnetic, antiferromagnetic, and paramagnetic phases, respectively. Furthermore, the constant  $C$  can be given by:

$$C = N_A \cdot \mu_0 \cdot \mu_{\text{eff}}^2 / (3k_B) \quad (2)$$

where the  $\mu_{\text{eff}}^2 = g_J(J+1)J \cdot \mu_B^2$ ,  $k_B$  is Boltzmann's constant,  $N_A$  the Avogadro constant,  $g_J$  the Landé g-factor,  $\mu_B$  the Bohr magneton,  $J$  the angular momentum quantum number.

The Equation (2) calculated with the Gaussian units can give a: <sup>29</sup>

$$\mu_{\text{eff}} = (8C)^{1/2} \mu_B \quad [\text{cgs}] \quad (3)$$

The  $\chi^2 \sim T$  curves were fitted to obtain the  $C$  constants, and then the  $\mu_{\text{eff}}$  were calculated.

### Supplementary Note 3, Distinguish the side-jump and intrinsic anomalous Hall conductivity:

We try to distinguish the side-jump and intrinsic contributions of the  $\sigma_{xy}^M$  in the high conductivity region, which is generally considered through the following equation: <sup>36-39</sup>

$$\sigma_{xy}^{\text{AHE}} = -(\alpha \sigma_{xx0}^{-1} + \beta \sigma_{xx0}^{-2}) M \sigma_{xx}(T)^2 + b M \quad (4)$$

Where, the  $M$  is the magnetization,  $[\alpha \sigma_{xx0}^{-1} M \sigma_{xx}(T)^2]$ ,  $[\beta \sigma_{xx0}^{-2} M \sigma_{xx}(T)^2]$ , and  $(b M)$  correspond to the anomalous Hall conductivity due to skew scattering, side-jump, and intrinsic mechanisms, respectively. The skew scattering in such a regime is negligible ( $\alpha \approx 0$ ). We then carried out the fitting of  $\sigma_{xy}^M \sim \sigma_{xx}(T)^2$  for the 10 nm, 20 nm, and 40 nm films respectively, as shown in Supplementary Fig. 9. Considering the  $M$  does not decrease too much with temperature increasing, the data of 3 K to 20 K were used. Note that the conductivity does not change too much within such a temperature region, and we can only obtain an estimation with the fitting by Equation (4), and an intrinsic anomalous Hall conductivity ( $\sigma_{xy}^{\text{int}}$ ) of  $\sim 14$  S/cm is obtained.

### Supplementary Table 1, Spin order and moments of $\text{Ru}_{0.75}\text{Cr}_{0.25}\text{O}_2$ calculated with DFT with the b-axis doubled cell.

| Cr at Ru-1 site |                    | Cr at Ru-2 site |                    |
|-----------------|--------------------|-----------------|--------------------|
| Cr-1            | 1.8456 ( $\mu_B$ ) | Ru-1            | 0.1912 ( $\mu_B$ ) |
| Ru-2            | -0.1911            | Cr-2            | -1.8456            |
| Ru-1            | 0.0642             | Ru-1            | 0.1912             |
| Ru-2            | -0.1911            | Ru-2            | -0.0642            |

**Supplementary Table 2, Spin order and moments calculated with DFT for  $\text{Ru}_{0.5}\text{Cr}_{0.5}\text{O}_2$ .**

| Cr at Ru-1 site |                    | Cr at Ru-2 site |                    |
|-----------------|--------------------|-----------------|--------------------|
| Cr-1            | 1.8434 ( $\mu_B$ ) | Ru-1            | 0.4031 ( $\mu_B$ ) |
| Ru-2            | -0.4023            | Cr-2            | -1.8436            |

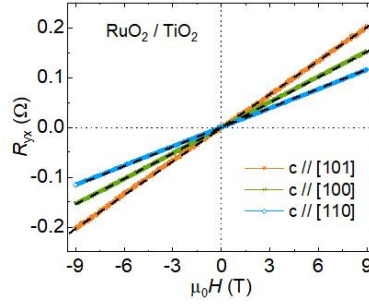

**Supplementary Fig. 1, AHE in  $\text{RuO}_2$  films grown on  $\text{TiO}_2$ .** Magnetic field dependent Hall resistances ( $R_{yx}$ ) of the  $\text{RuO}_2$  films grown on  $\text{TiO}_2$  with c axis along [100], [110], and [101] at 3 K.

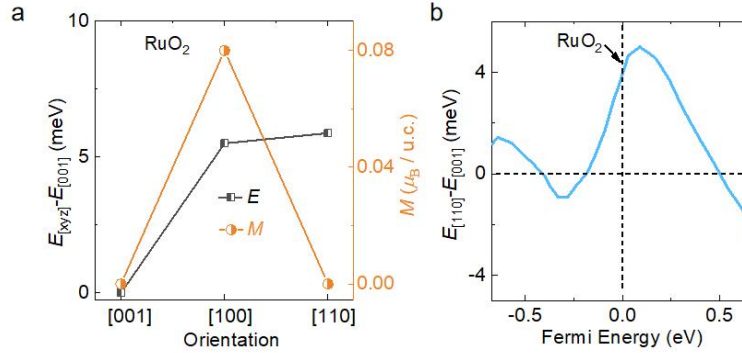

**Supplementary Fig. 2, DFT+ $U$  calculations on the anisotropy of pure  $\text{RuO}_2$ .** **a**, Calculated energy ( $E$ ) and net moment ( $M$ ) in pure  $\text{RuO}_2$  with  $U = 3$  eV depending on the initial orientation of the Néel vector. The state with Néel vector along [001] exhibits the lowest energy and no spontaneous moment. The states with Néel vector along [100] or [110] show about 5 meV higher energy, while the [100] case generates a spontaneous moment of  $0.08 \mu_B / \text{unit cell}$ . **b**, Calculated energy difference,  $E_{[110]} - E_{[001]}$ , in pure  $\text{RuO}_2$  depending on the Fermi level. Data are obtained from reference 19.

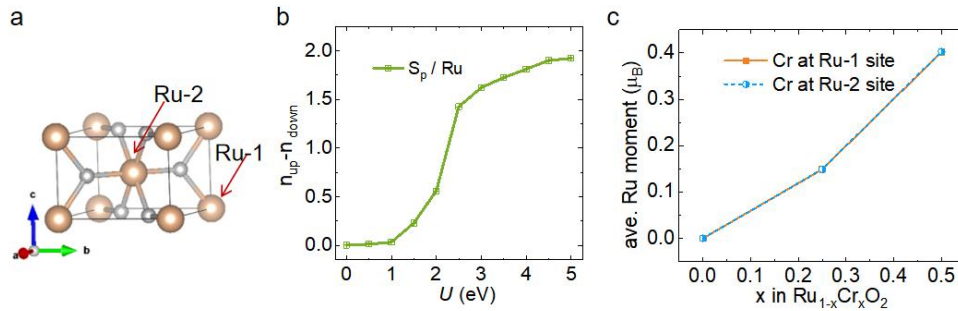

**Supplementary Fig. 3, Calculated results for Ru<sub>1-x</sub>Cr<sub>x</sub>O<sub>2</sub>.** **a**, Crystal structure of one unit cell of RuO<sub>2</sub>, where the two Ru sites are labeled as Ru-1 and Ru-2. **b**, DFT+DMFT result of the spin polarization ( $S_p = n_{up} - n_{down}$ ) of RuO<sub>2</sub>, plotted against the onsite Coulomb interaction  $U$ . For a small  $U$  ( $< 1$  eV),  $S_p$  is almost negligible while it increases distinctly around  $U = 2-3$  eV. **c**, Average Ru moment with respect to the Cr doping level  $x$  in Ru<sub>1-x</sub>Cr<sub>x</sub>O<sub>2</sub>, calculated with DFT.

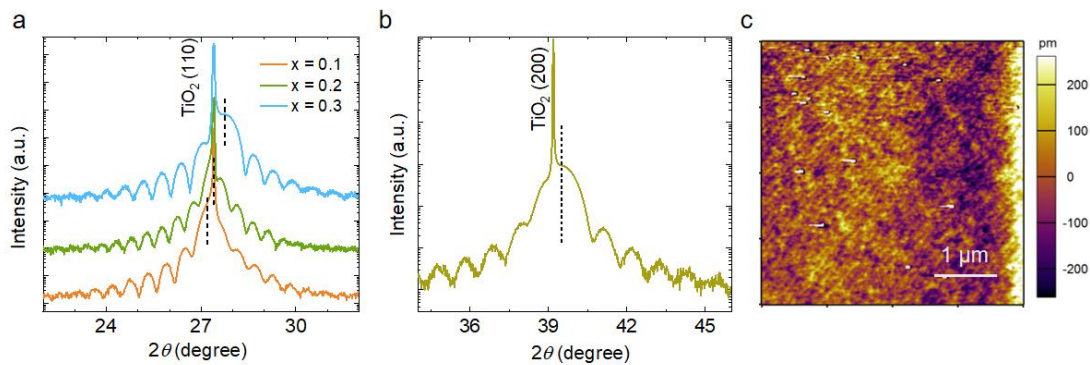

**Supplementary Fig. 4, Structure characteristics and surface morphology of the Ru<sub>1-x</sub>Cr<sub>x</sub>O<sub>2</sub> films.** **a**, XRD  $2\theta$ - $\omega$  curves of Ru<sub>1-x</sub>Cr<sub>x</sub>O<sub>2</sub> with  $x = 0.1, 0.2$  and  $0.3$ , measured around the TiO<sub>2</sub> (110). **b**,  $2\theta$ - $\omega$  curve of the Ru<sub>0.8</sub>Cr<sub>0.2</sub>O<sub>2</sub> film grown on TiO<sub>2</sub> (200). The diffraction peaks of the films are indicated by the d lines. **c**, surface morphology of the Ru<sub>0.8</sub>Cr<sub>0.2</sub>O<sub>2</sub> (110) film measured by atomic force microscopy (AFM).

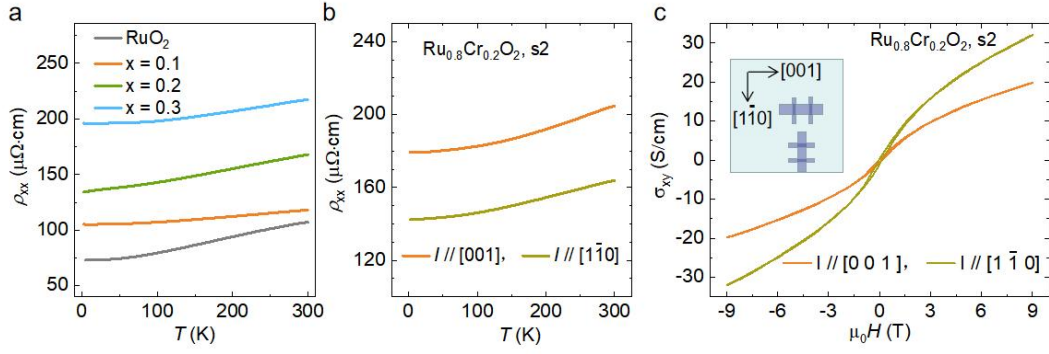

**Supplementary Fig. 5, Transport properties in  $\text{Ru}_{1-x}\text{Cr}_x\text{O}_2$  (110) and the  $x = 0.2$  film with current along different directions.** **a**, Temperature-dependent resistivities ( $RT$ ) curves in  $\text{Ru}_{1-x}\text{Cr}_x\text{O}_2$  films grown on  $\text{TiO}_2$  (110). **b**,  $RT$  curves in  $\text{Ru}_{0.8}\text{Cr}_{0.2}\text{O}_2$  measured with current along two orientations. **c**,  $\sigma_{xy}$  with magnetic field sweeping at 3 K in two current directions. The inset shows the configuration of the Hall measurements. S2, Sample No. 2 of the  $\text{Ru}_{0.8}\text{Cr}_{0.2}\text{O}_2$  film.

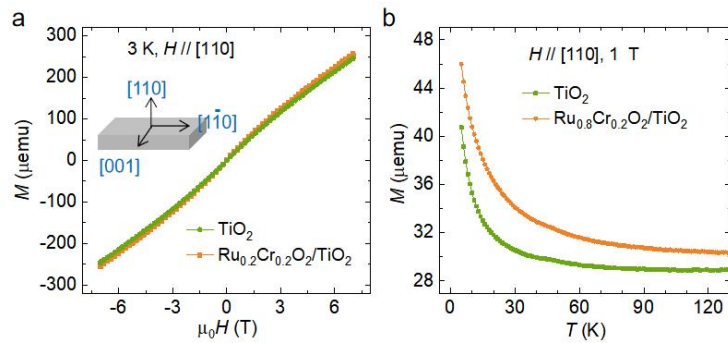

**Supplementary Fig. 6, Magnetization measurements in a  $\text{Ru}_{0.8}\text{Cr}_{0.2}\text{O}_2$  (110) film.** **a**, **b**, Raw data for magnetization in the  $\text{Ru}_{0.8}\text{Cr}_{0.2}\text{O}_2/\text{TiO}_2$  sample and a pure  $\text{TiO}_2$  substrate with magnetic field (a) and temperature (b) dependence. The inset in (A) illustrates the crystal orientation of the film. The film thickness is 55 nm.

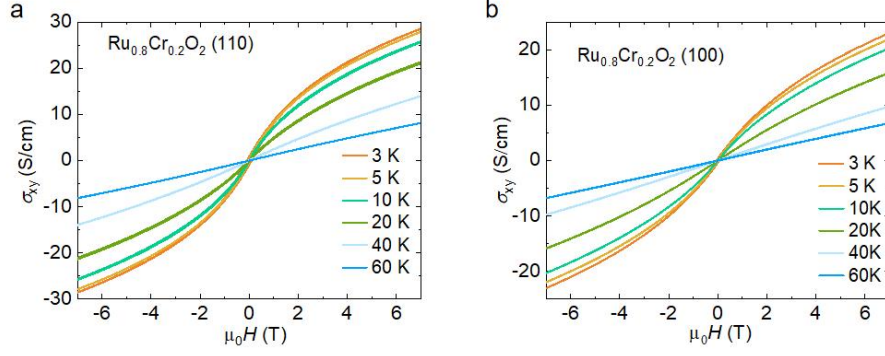

**Supplementary Fig. 7, Magnetic-field dependent Hall conductivity at various temperatures.**  $\sigma_{xy}$  with magnetic field dependence measured at a series of temperatures for  $\text{Ru}_{0.8}\text{Cr}_{0.2}\text{O}_2$  films grown along the (110) and (100) orientations.

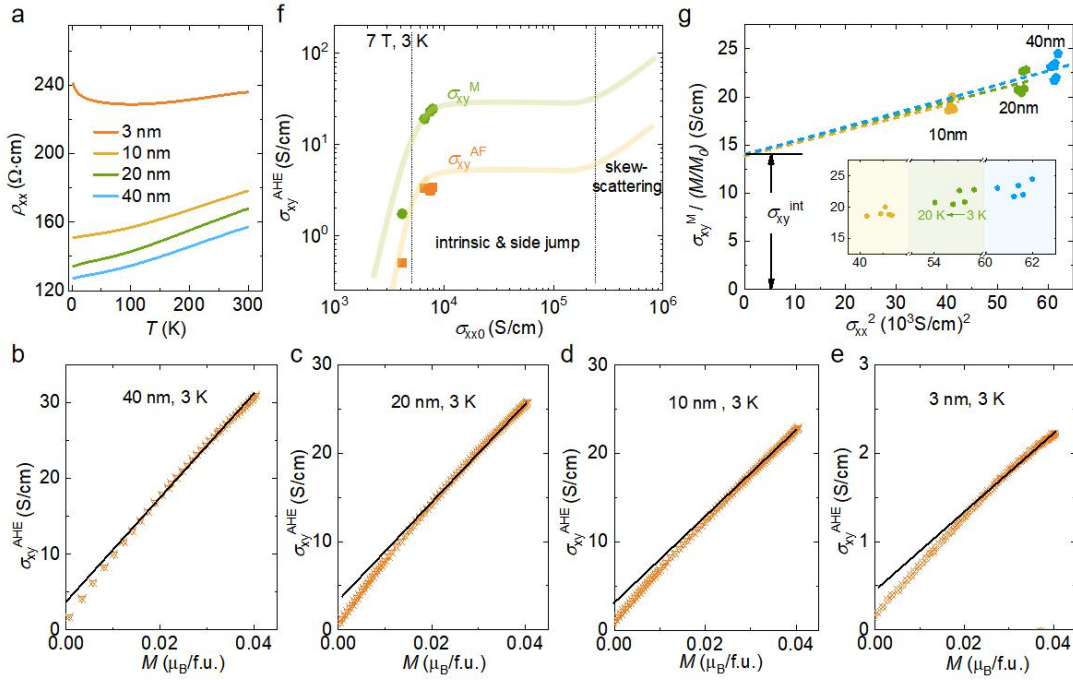

**Supplementary Fig. 8, Scaling of  $\sigma_{xy}^M \sim \sigma_{xx}$  in the  $\text{Ru}_{0.8}\text{Cr}_{0.2}\text{O}_2$  (110) films.** Evolution of anomalous Hall conductivity with the longitudinal conductivity from an itinerant metal to a localized state in  $\text{Ru}_{0.8}\text{Cr}_{0.2}\text{O}_2$ . **a**,  $RT$  curves of the  $\text{Ru}_{0.8}\text{Cr}_{0.2}\text{O}_2$  films with thickness changing. **b-e**, Fittings of the  $\sigma_{xy}^{\text{AHE}} - M$  curves at high field regions to obtain the  $\sigma_{xy}^{\text{M}}$  and  $\sigma_{xy}^{\text{AF}}$  components for the films with a thickness of 40 nm (b), 20 nm (c), 10 nm (d), and 3 nm (e). **f**, Evolution of  $\sigma_{xy}^{\text{M}}$  and  $\sigma_{xy}^{\text{AF}}$  with the changing of  $\sigma_{xx0}$ .  $\sigma_{xx0}$  are set by the conductivity at 3 K. Dash lines denoting the boundaries of two regions, are given by reference 37. **g**, Linear fitting of the

normalized  $\sigma_{xy}^M - \sigma_{xx}(T)^2$  with the data of 3 K - 20 K used for the 10 nm, 20 nm, and 40 nm films, respectively. The intercept denotes the intrinsic term of anomalous Hall conductivity. Inset, a zoom-in of the data.

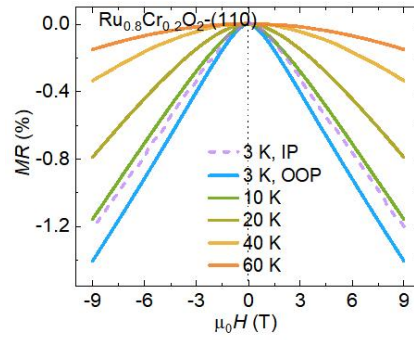

**Supplementary Fig. 9, Magnetoresistivity (MR) measured for the  $\text{Ru}_{0.8}\text{Cr}_{0.2}\text{O}_2$  (110) film.** Out-of-plane (OOP) MR curves were measured at a series of temperatures and compared to the in-plane (IP) MR at 3 K. The IP field was along [001]. The current was along  $[1\bar{1}0]$  for all measurements.
